# Supplementary material for: Diagnostic value of cutaneous manifestation of SARS-CoV-2 infection
Source: bioRxiv or medRxiv preprint supplement (doi:10.1101/2020.07.10.20150656), 2020-10-26
Supplement: Supplementary file [file 2020.07.10.20150656-1.pdf]

## Supplementary Material

### Supplementary Tables

**Supplementary Table 1. Sample characteristics.** Values are reported as number and percentage. Ethnicity, smoking, disease status and medications were compared using Pearson's  $\chi^2$  test, as implemented in the *prop.test* function (*stats* R package, v 3.6.0). "Users tested" refers to individuals self-reporting a positive or negative swab test result. "Symptomatic untested users" refers to individuals who reported at least one of the 16 collected symptoms, did not believe that they had already had COVID-19 when registering with the app, and had not been tested for SARS-CoV-2. "Classic symptoms" refer to those included in the NHS guidelines (*i.e.*, fever, persistent cough, and/or anosmia), whose presence would require isolation and testing for SARS-CoV-2 infection.

|                       | All users       | Users tested for SARS-CoV-2 |               |                |                       | Symptomatic untested users |                         |                          | P      |
|-----------------------|-----------------|-----------------------------|---------------|----------------|-----------------------|----------------------------|-------------------------|--------------------------|--------|
|                       |                 | All                         | Positive      | Negative       | P                     | All                        | With classical symptoms | Without classic symptoms |        |
| N                     | 336,847         | 27,157                      | 2,021         | 25,136         |                       | 54,652                     | 17,371                  | 37,281                   |        |
| Ethnicity             |                 |                             |               |                | 4.72x10 <sup>-6</sup> |                            |                         |                          | <2e-16 |
| Asian                 | 6,503 (1.9%)    | 646 (2.4%)                  | 70 (3.5%)     | 576 (2.3%)     |                       | 1,029 (1.9%)               | 422 (2.4%)              | 607 (1.6%)               |        |
| Black                 | 2,105 (0.6%)    | 232 (0.9%)                  | 34 (1.7%)     | 198 (0.8%)     |                       | 370 (0.7%)                 | 143 (0.8%)              | 227 (0.6%)               |        |
| Chinese               | 1,029 (0.3%)    | 87 (0.3%)                   | 6 (0.3%)      | 81 (0.3%)      |                       | 134 (0.2%)                 | 43 (0.2%)               | 91 (0.2%)                |        |
| Middle East           | 1,204 (0.4%)    | 114 (0.4%)                  | 13 (0.6%)     | 101 (0.4%)     |                       | 187 (0.3%)                 | 84 (0.5%)               | 103 (0.3%)               |        |
| Mixed                 | 6,974 (2.1%)    | 526 (1.9%)                  | 35 (1.7%)     | 491 (2.0%)     |                       | 1,295 (2.4%)               | 508 (2.9%)              | 787 (2.1%)               |        |
| White                 | 316,567 (94.0%) | 25,341 (93.3%)              | 1,840 (91.0%) | 23,501 (93.5%) |                       | 51,188 (93.7%)             | 16,021 (92.2%)          | 35,167 (94.3%)           |        |
| N/A                   | 2,465 (0.7%)    | 211 (0.8%)                  | 23 (1.1%)     | 188 (0.7%)     |                       | 449 (0.8%)                 | 150 (0.9%)              | 299 (0.8%)               |        |
| Smoking status        |                 |                             |               |                | 0.04                  |                            |                         |                          | <2e-16 |
| Never                 | 241,093 (71.6%) | 18,499 (68.1%)              | 1,396 (69.1%) | 17,103 (68.0%) |                       | 37,932 (69.4%)             | 11,752 (67.7%)          | 26,180 (70.2%)           |        |
| Ex                    | 62,563 (18.6%)  | 5,655 (20.8%)               | 436 (21.6%)   | 5,219 (20.8%)  |                       | 10,726 (19.6%)             | 3,193 (18.4%)           | 7,533 (20.2%)            |        |
| Current               | 33,176 (9.8%)   | 3,002 (11.1%)               | 189 (9.4%)    | 2,813 (11.2%)  |                       | 5,994 (11.0%)              | 2,426 (14.0%)           | 3,568 (9.6%)             |        |
| Has diabetes (%)      | 12,884 (3.8%)   | 1,119 (4.4%)                | 113 (5.6%)    | 1,078 (4.3%)   | 7.04x10 <sup>-3</sup> | 2,109 (3.9%)               | 704 (4.1%)              | 1,405 (3.8%)             | 0.11   |
| Has heart disease (%) | 10,052 (3.0%)   | 936 (3.4%)                  | 78 (3.9%)     | 858 (3.4%)     | 0.32                  | 1,663 (3.0%)               | 529 (3.0%)              | 1,134 (3.0%)             | 1.00   |

|                                |               |               |             |               |                       |               |               |               |                        |
|--------------------------------|---------------|---------------|-------------|---------------|-----------------------|---------------|---------------|---------------|------------------------|
| Has lung disease (%)           | 31,489 (9.3%) | 3,150 (11.6%) | 264 (13.1%) | 2,886 (11.5%) | $3.58 \times 10^{-2}$ | 6,912 (12.6%) | 2,603 (15.0%) | 4,309 (11.6%) | $3.71 \times 10^{-29}$ |
| Has kidney disease (%)         | 2,598 (0.8%)  | 293 (1.1%)    | 29 (1.4%)   | 264 (1.1%)    | 0.13                  | 527 (1.0%)    | 169 (1.0%)    | 358 (1.0%)    | 0.93                   |
| Has cancer (%)                 | 4,456 (1.3%)  | 543 (2.0%)    | 34 (1.7%)   | 509 (2.0%)    | 0.33                  | 660 (1.2%)    | 210 (1.2%)    | 450 (1.2%)    | 1.00                   |
| Corticosteroids (%)            | 24,583 (7.3%) | 2,491 (9.2%)  | 190 (9.4%)  | 2,301 (9.2%)  | 0.74                  | 5,601 (10.2%) | 2,028 (11.7%) | 3,573 (9.6%)  | $6.95 \times 10^{-14}$ |
| Immunosuppressants (%)         | 12,006 (3.6%) | 1,138 (4.2%)  | 75 (3.7%)   | 1,063 (4.2%)  | 0.29                  | 2,415 (4.4%)  | 910 (5.2%)    | 1,505 (4.0%)  | $2.26 \times 10^{-10}$ |
| Blood pressure medications (%) | 44,061 (13%)  | 3,593 (13.2%) | 273 (13.5%) | 3,320 (13.2%) | 0.73                  | 6,272 (11.5%) | 1,852 (10.7%) | 4,420 (11.9%) | $4.80 \times 10^{-5}$  |

**Supplementary Table 2. Sensitivity analysis for multivariate logistic regression.** “All tested” refers to individuals self-reporting a positive or negative swab test result. “All tested, no healthcare workers” refers to individuals self-reporting a positive or negative swab test result but not declaring to be healthcare workers. “Symptomatic untested users” refers to individuals who reported at least one of the 16 collected symptoms, did not believe that they had already had COVID-19 when registering with the app, and had not been tested for SARS-CoV-2.

|            | <b>Model</b>                      | <b>N</b> | <b>OR</b> | <b>95% CI</b> | <b>P value</b>         |
|------------|-----------------------------------|----------|-----------|---------------|------------------------|
|            | All tested                        | 26,945   | 1.65      | 1.37-1.99     | 1.30x10 <sup>-7</sup>  |
|            | All tested, no healthcare workers | 19,516   | 1.52      | 1.15-2.02     | 3.72x10 <sup>-3</sup>  |
| Body rash  | Only males tested                 | 10,598   | 1.52      | 1.04-2.21     | 0.03                   |
|            | Only females tested               | 16,347   | 1.71      | 1.38-2.12     | 9.59x10 <sup>-7</sup>  |
|            | Symptomatic untested users        | 54,203   | 1.46      | 1.35-1.58     | 2.92x10 <sup>-20</sup> |
|            |                                   |          |           |               |                        |
|            | All tested                        | 26,945   | 1.73      | 1.32-2.27     | 7.25x10 <sup>-5</sup>  |
|            | All tested, no healthcare workers | 19,516   | 1.83      | 1.25-2.66     | 1.69x10 <sup>-3</sup>  |
| Acral rash | Only males tested                 | 10,598   | 1.15      | 0.66-1.99     | 0.63                   |
|            | Only females tested               | 16,347   | 2.05      | 1.49-2.80     | 8.14x10 <sup>-6</sup>  |
|            | Symptomatic untested users        | 54,203   | 1.08      | 0.96-1.22     | 0.22                   |
|            |                                   |          |           |               |                        |
